# Supplementary material
Source: publisher site journal article supplement (https://dez.pensoft.net/article/19859/download/suppl/32/)
Supplement: Supplementary file 1

## Sheet: Tabelle1
No.	Order	Family	Genus	Species	Author	Year	Status	Number/Sex	Country	Continent	Location	Lat	Long	Elevation	Collector	Collecting Date	Source
1	Raphidioptera	Raphidiidae	Raphidia	mediterranea	H. Aspöck et al.	1977	HT	1m	Greece	Europe	Attika, Pendelikon	38°5'N	23°50'E	700-800m	H. et U. Aspöck, H. Rausch, E. Hüttinger	1969-05-19	H. Aspöck et al. 1977
2	Raphidioptera	Raphidiidae	Raphidia	mediterranea	H. Aspöck et al.	1977	PT	53m, 29f	Greece	Europe	Attika, Pendelikon	38°5'N	23°50'E	700-800m	H. et U. Aspöck, H. Rausch, E. Hüttinger	19.05.1969 und 12.5.1973	H. Aspöck et al. 1977
3	Raphidioptera	Raphidiidae	Raphidia	mediterranea	H. Aspöck et al.	1977	PT	1m, 1f	Greece	Europe	Larisa, Ossa	39°50'N	22°40'E	900m	H. et L. Hölzel	1973-05-10	H. Aspöck et al. 1977
4	Raphidioptera	Raphidiidae	Raphidia	mediterranea	H. Aspöck et al.	1977	PT	2m, 1f	Greece	Europe	Magnisia, Pilion	39°24'N	23°5'E	800m	H. et L. Hölzel	1974-05-08	H. Aspöck et al. 1977
5	Raphidioptera	Raphidiidae	Raphidia	mediterranea	H. Aspöck et al.	1977	PT	1m	Greece	Europe	Magnisia, Othrys, über Kokoti	39°5'N	22°40'E	1100m	H. et L. Hölzel	1974-06-10	H. Aspöck et al. 1977
6	Raphidioptera	Raphidiidae	Raphidia	mediterranea	H. Aspöck et al.	1977	PT	3m, 3f	Greece	Europe	Böotien, Parnassos	38°30'N	22°35'E	1200m	H. et L. Hölzel	1969-06-01	H. Aspöck et al. 1977
7	Raphidioptera	Raphidiidae	Raphidia	mediterranea	H. Aspöck et al.	1977	PT	4m, 5f	Greece	Europe	Parnassos, bei Arachova	38°28'N	22°35'E	900m	H. et L. Hölzel	1974-06-06	H. Aspöck et al. 1977
8	Raphidioptera	Raphidiidae	Raphidia	mediterranea	H. Aspöck et al.	1977	PT	1m	Greece	Europe	Phokis, Delphi	38°28'N	22°30'E	600m	Schurmann	1969-06-01	H. Aspöck et al. 1977
9	Raphidioptera	Raphidiidae	Raphidia	mediterranea	H. Aspöck et al.	1977	PT	13m, 22f	Greece	Europe	Böotien, Messapion	38°25'N	23°33'E	500m	Schurmann	1974-04-16	H. Aspöck et al. 1977
10	Raphidioptera	Raphidiidae	Raphidia	mediterranea	H. Aspöck et al.	1977	PT	1m, 4f	Greece	Europe	Bäotien, Helikon, Kiriaki	38°21'N	22°47'E	700m	Schurmann	1974-06-06	H. Aspöck et al. 1977
11	Raphidioptera	Raphidiidae	Raphidia	mediterranea	H. Aspöck et al.	1977	PT	2m, 1f	Greece	Europe	Böotien, Helikon/über Koukoura	38°20'N	22°52'E	800m	Schurmann	1974-06-06	H. Aspöck et al. 1977
12	Raphidioptera	Raphidiidae	Raphidia	mediterranea	H. Aspöck et al.	1977	PT	5m, 7f	Greece	Europe	Attika-Böotien (Grenzbereich), Kitherojn	38°10'N	23°15'E	800m	Schurmann	1974-06-08	H. Aspöck et al. 1977
13	Raphidioptera	Raphidiidae	Raphidia	mediterranea	H. Aspöck et al.	1977	PT	7m, 18f	Greece	Europe	Attika, Pateras	38°6'N	23°20'E	1000m	Schurmann	1974-06-08	H. Aspöck et al. 1977
14	Raphidioptera	Raphidiidae	Raphidia	mediterranea	H. Aspöck et al.	1977	PT	3m, 7f	Greece	Europe	Attika, Parnis	38°10'N	23°40'E	1000-1100m	Schurmann	18.5.1969, 5.6.1974 und 12.5.1973	H. Aspöck et al. 1977
15	Raphidioptera	Raphidiidae	Raphidia	mediterranea	H. Aspöck et al.	1977	PT	7m, 7f	Greece	Europe	Attika, Hymettos	37°56'47"N	23°49'E		Schurmann	1971-05-01	H. Aspöck et al. 1977
16	Raphidioptera	Raphidiidae	Raphidia	mediterranea	H. Aspöck et al.	1977	PT	3f	Greece	Europe	Athen-Kifissia	38°5'N	23°49'E	100m	A. Koutsaftikis, H. Malicky	27.05.1973 und 16.5.1975	H. Aspöck et al. 1977
17	Raphidioptera	Raphidiidae	Raphidia	mediterranea	H. Aspöck et al.	1977	PT	1f	Greece	Europe	Korinth, Akrokorinth	37°53'27.54"N	22°52'12.11"E		P. Schurmann	1971-05-01	H. Aspöck et al. 1977
18	Raphidioptera	Raphidiidae	Raphidia	mediterranea	H. Aspöck et al.	1977	PT	2f	Greece	Europe	Korinth, Xylokastron	38°5'N	22°35'E	2m	P. Schurmann	1969-05-29	H. Aspöck et al. 1977
19	Raphidioptera	Raphidiidae	Raphidia	mediterranea	H. Aspöck et al.	1977	PT	1m, 2f	Greece	Europe	Achaia, Ana-Zachlorou	38°5'N	22°8'E	1000m	P. Schurmann	1969-05-26	H. Aspöck et al. 1977
20	Raphidioptera	Raphidiidae	Raphidia	mediterranea	H. Aspöck et al.	1977	PT	1f	Greece	Europe	Achaia, Zachlorou	38°5'N	22°9'E		P. Schurmann	1971-05-01	H. Aspöck et al. 1977
21	Raphidioptera	Raphidiidae	Raphidia	mediterranea	H. Aspöck et al.	1977	PT	1m	Greece	Europe	Achaia, Kalavrita	38°1'59.81"N	22°6'37.25"E		P. Schurmann	1971-05-01	H. Aspöck et al. 1977
22	Raphidioptera	Raphidiidae	Raphidia	mediterranea	H. Aspöck et al.	1977	PT	4f	Greece	Europe	Achaia, Aegeira	38°4'23.02"N	22°19'18.68"E		G. Novak	21.5.-2.6.1972 und Mai.75	H. Aspöck et al. 1977
23	Raphidioptera	Raphidiidae	Raphidia	mediterranea	H. Aspöck et al.	1977	PT	1f	Greece	Europe	Achaia, Patras	38°14'47.85"N	21°44'4.56"E		W. Wittmer	1971	H. Aspöck et al. 1977
24	Raphidioptera	Raphidiidae	Raphidia	mediterranea	H. Aspöck et al.	1977	PT	1f	Greece	Europe	Arkadien, Levidi	37°40'N	22°20'E	850m	G. Wewalka	1969-05-23	H. Aspöck et al. 1977
25	Raphidioptera	Raphidiidae	Raphidia	mediterranea	H. Aspöck et al.	1977	PT	11m, 10f	Greece	Europe	Euboea, Chalkis	38°27'52.28"N	23°36'18.21"E		G. Wewalka	1971-05-07	H. Aspöck et al. 1977
26	Raphidioptera	Raphidiidae	Raphidia	mediterranea	H. Aspöck et al.	1977	PT	1m, 2f	Greece	Europe	Euboea, NE Pisonda	38°33'N	23°45'E	300m	G. Wewalka	1974-05-14	H. Aspöck et al. 1977
27	Raphidioptera	Raphidiidae	Raphidia	mediterranea	H. Aspöck et al.	1977	PT	28m, 26f	Greece	Europe	Euboea, NE Steni Dirphios	38°38'N	23°49'E	650-1100m	G. Wewalka	28.05.1973 und 16.5.1974	H. Aspöck et al. 1977
28	Raphidioptera	Raphidiidae	Raphidia	mediterranea	H. Aspöck et al.	1977	PT	1m, 1f	Greece	Europe	Euboea, Nordost-Abfall des Dirphys, über Stropones	38°37'N	23°53'E	730m	G. Wewalka	1974-05-15	H. Aspöck et al. 1977
29	Raphidioptera	Raphidiidae	Raphidia	mediterranea	H. Aspöck et al.	1977	PT	9m, 6f	Greece	Europe	Euboea, S Seta	38°27'N	23°53'E	850m	G. Wewalka	1974-05-13	H. Aspöck et al. 1977
30	Raphidioptera	Raphidiidae	Raphidia	mediterranea	H. Aspöck et al.	1977	PT	9m, 3f	Greece	Europe	Euboea, N Eretria	38°24'15"N	23°47'38"E		G. Wewalka	1974-05-03	H. Aspöck et al. 1977
31	Raphidioptera	Raphidiidae	Raphidia	mediterranea	H. Aspöck et al.	1977	PT	20m, 8f	Greece	Europe	Euboea, Ochtonia	38°33'N	24°10'E	500m	G. Novak	1974-05-13	H. Aspöck et al. 1977
32	Raphidioptera	Raphidiidae	Raphidia	mediterranea	H. Aspöck et al.	1977	PT	4f	Greece	Europe	Euboea, N Stira	38°10'N	24°15'E	300m	G. Novak	1973-05-29	H. Aspöck et al. 1977
33	Raphidioptera	Raphidiidae	Raphidia	mediterranea	H. Aspöck et al.	1977	PT	2m, 4f	Greece	Europe	Euboea, Marmarion	38°3'N	24°19'E		G. Novak	12.-14.5.1971	H. Aspöck et al. 1977
34	Raphidioptera	Raphidiidae	Raphidia	mediterranea	H. Aspöck et al.	1977	PT	21m, 22f	Greece	Europe	Euboea, Ochi-Gebirge, über Paradision	38°4'N	24°26'E	450m	H. Malicky	1973-05-29	H. Aspöck et al. 1977
35	Raphidioptera	Raphidiidae	Raphidia	mediterranea	H. Aspöck et al.	1977	PT	196m, 103f	Greece	Europe	Skyros	38°56'N	24°30'E	10-400m	H. Malicky	1974-05-12	H. Aspöck et al. 1977
36	Raphidioptera	Raphidiidae	Raphidia	mediterranea	H. Aspöck et al.	1977	PT	20m, 9f	Greece	Europe	Paros, Moni Thapsanon	37°3'N	25°30'E	400m	H. Malicky	1973-05-13	H. Aspöck et al. 1977
37	Raphidioptera	Raphidiidae	Raphidia	mediterranea	H. Aspöck et al.	1977	PT	27m, 19f	Greece	Europe	Naxos, W Chalki	37°4'N	25°30'E			1973-05-13	H. Aspöck et al. 1977
38	Raphidioptera	Raphidiidae	Raphidia	mediterranea	H. Aspöck et al.	1977	PT	7m, 7f	Greece	Europe	Naxos, Apeiranthos	37°5'N	25°35'E	620m		1973-05-13	H. Aspöck et al. 1977
39	Raphidioptera	Raphidiidae	Raphidia	mediterranea	H. Aspöck et al.	1977	PT	24m, 15f	Greece	Europe	Naxos, Filotion	37°3'N	25°30'E	500m		1973-05-14	H. Aspöck et al. 1977
40	Raphidioptera	Raphidiidae	Raphidia	mediterranea	H. Aspöck et al.	1977	PT	4m, 4f	Greece	Europe	Naxos, E Naxos	37°6'N	26°25'E	30m		1973-05-14	H. Aspöck et al. 1977
41	Raphidioptera	Raphidiidae	Raphidia	mediterranea	H. Aspöck et al.	1977	PT	7m, 26f	Greece	Europe	Ikaria, um Monokampion	37°39'N	26°20'E	280-650m		1973-05-22	H. Aspöck et al. 1977
42	Raphidioptera	Raphidiidae	Raphidia	mediterranea	H. Aspöck et al.	1977	PT	1m, 17f	Greece	Europe	Ikaria, um Christostomos	37°35'N	26°13'E	20-450m		1973-05-24	H. Aspöck et al. 1977
43	Raphidioptera	Raphidiidae	Raphidia	mediterranea	H. Aspöck et al.	1977		6m, 4f	Greece	Europe	Peloponnes, über Kato Zachlorou	38°5,793'N	22°9,707'E	650m	H. et U. Aspöck	2008-05-25	Coll. NHMW
44	Raphidioptera	Raphidiidae	Raphidia	mediterranea	H. Aspöck et al.	1977			Greece	Europe	Kithairon Gebirge	38°11'4"N	23°14' 57"E		H. et U. Aspöck		H. Aspöck et al. 1991
45	Raphidioptera	Raphidiidae	Raphidia	mediterranea	H. Aspöck et al.	1977			Greece	Europe	Insel Hydra	37°20'N	23°28'E		H. et U. Aspöck		H. Aspöck et al. 1991
46	Raphidioptera	Raphidiidae	Raphidia	mediterranea	H. Aspöck et al.	1977		1f	Greece	Europe	Morea sept, Zachlorou	38°5,793'N	22°9,707'E		C. v. Demelt	21702	Coll. NHMW (Hölzel)
47	Raphidioptera	Raphidiidae	Raphidia	mediterranea	H. Aspöck et al.	1977		1m	Greece	Europe	Parnassos b. Arahova	38°25'N	22°38'E	900m	H. et. L. Hölzel	27186	Coll. NHMW (Hölzel)
48	Raphidioptera	Raphidiidae	Raphidia	mediterranea	H. Aspöck et al.	1977		1f	Greece	Europe	Karterion, N-Peloponnes	37°51'0"N	22°25'0"E		Kritscher	30822	Coll. NHMW
49	Raphidioptera	Raphidiidae	Raphidia	mediterranea	H. Aspöck et al.	1977		1f	Greece	Europe	Attica	38°2'45"N	23°51'30"E		Krüper	28.5.1867	Coll. NHMW
50	Raphidioptera	Raphidiidae	Raphidia	mediterranea	H. Aspöck et al.	1977	PT?	1f	Greece	Europe	Naxos	37°3'19"N	25°28'48"E		Krüper	26.4.1862	Coll. NHMW
51	Raphidioptera	Raphidiidae	Raphidia	mediterranea	H. Aspöck et al.	1977	PT?	1m, 2f	Greece	Europe	Parnis z. Athen	38°10'22.37"N	23°43'0.47"E	1000m	H. et. L. Hölzel	27185	Coll. NHMW (Hölzel)
52	Raphidioptera	Raphidiidae	Raphidia	mediterranea	H. Aspöck et al.	1977	PT	17m, 16f	Italy	Europe	Apulien, Le Murge, SE Alberobello	40°45'N	17°16'E	400m	H. et L. Hölzel	27919	H. Aspöck et al. 1977
53	Raphidioptera	Raphidiidae	Raphidia	mediterranea	H. Aspöck et al.	1977	PT	1f	Italy	Europe	Apulien, Le Murge, SE Alberobello	40°45'N	17°16'E	400m	H. et L. Hölzel	27550	H. Aspöck et al. 1977
54	Raphidioptera	Raphidiidae	Raphidia	mediterranea	H. Aspöck et al.	1977	PT	1f	Italy	Europe	Apulien, Gargano, Vieste	41°52'57"N	16°10'36"E		W. Rossi	26061	H. Aspöck et al. 1977
68	Raphidioptera	Raphidiidae	Raphidia	mediterranea	H. Aspöck et al.	1977		2m	Italy	Europe	Puglia, Foggia prov., Gargano, near Mattinata harbour	41°43'6"N	16°3'38"E	50m	R. Güsten	34477	Güsten 1998
69	Raphidioptera	Raphidiidae	Raphidia	mediterranea	H. Aspöck et al.	1977		1f	Italy	Europe	Camaldoli (N Lancaldoli)	40°51'21.18"N	14°12'4.92"E				Pantaleoni 2005
70	Raphidioptera	Raphidiidae	Raphidia	mediterranea	H. Aspöck et al.	1977		1f	Italy	Europe	Roma, Nazzano	42°13'47.49"N	12°35'45.82"E		G. Perego	31533	Pantaleoni 2005
71	Raphidioptera	Raphidiidae	Raphidia	mediterranea	H. Aspöck et al.	1977		1m	Italy	Europe	Lazio: Alto Aniene (Roma) - Lazio Riofreddo	42°3'33"N	12°59'5"E		Cerruti	14791	Letardi & Pantaleoni 1996
55	Raphidioptera	Raphidiidae	Raphidia	mediterranea	H. Aspöck et al.	1977		1f	Italy	Europe	Puglia, Gargano	41°41'N	15°58'E	600m	H. et. L. Hölzel	27549	Coll. NHMW (Hölzel)
56	Raphidioptera	Raphidiidae	Raphidia	mediterranea	H. Aspöck et al.	1977	PT?	1f	Italy	Europe	Puglia, Le Murge, Alberobello	40°58'34"N	16°24'22"E	500m	H. Hölzel	27547	Coll. NHMW (Hölzel)
57	Raphidioptera	Raphidiidae	Raphidia	mediterranea	H. Aspöck et al.	1977		nn	Austria	Europe	Pelmberg near Hellmonsödt in the Mühlviertel	48°24’32’’N	14°19’13’’E	810m		Juni 2013-2015	Rausch et al. 2016
58	Raphidioptera	Raphidiidae	Raphidia	mediterranea	H. Aspöck et al.	1977		nn m	Hungaria	Europe	Baja, Buvat, gallery forest	46°10'54.46"N	18°57'15.50"E		L. Gozmány	22824	Sziráki 1993a
59	Raphidioptera	Raphidiidae	Raphidia	mediterranea	H. Aspöck et al.	1977		nn f	Hungaria	Europe	Biatorbágy, Bia	47°28'14.40"N	18°49'14.02"E		Benedek	23169	Sziráki 1993a
60	Raphidioptera	Raphidiidae	Raphidia	mediterranea	H. Aspöck et al.	1977		nn f	Hungaria	Europe	Hajdúhadház	47°40'48.82"N	21°40'3.01"E			10020	Sziráki 1993a
61	Raphidioptera	Raphidiidae	Raphidia	mediterranea	H. Aspöck et al.	1977		nn m, nn f	Hungaria	Europe	Hódmezõvárhely	46°25'5.38"N	20°19'48.25"E		Bodnár		Sziráki 1993a
62	Raphidioptera	Raphidiidae	Raphidia	mediterranea	H. Aspöck et al.	1977		nn m	Hungaria	Europe	Mosonmagyaróvár, from a stable	47°52'5.32"N	17°16'8.13"E		Benedek	1963-06-18	Sziráki 1993a
63	Raphidioptera	Raphidiidae	Raphidia	mediterranea	H. Aspöck et al.	1977		nn f	Hungaria	Europe	Tompa, park	46°12'22.14"N	19°32'19.76"E		Erdõs	1962-06-14	Sziráki 1993a
64	Raphidioptera	Raphidiidae	Raphidia	mediterranea	H. Aspöck et al.	1977		nn m, nn f	Hungaria	Europe	Vasegerszeg	47°22'17.28"N	16°55'3.41"E		Németh	1962-05-12	Sziráki 1993a
65	Raphidioptera	Raphidiidae	Raphidia	mediterranea	H. Aspöck et al.	1977		nn m	Hungaria	Europe	Zalavár, Lebúj-puszta (Kis-Balaton)	46°40'2.67"N	17°9'35.28"E		Kaszab		Sziráki 1993a
66	Raphidioptera	Raphidiidae	Raphidia	mediterranea	H. Aspöck et al.	1977		nn m	Hungaria	Europe	Zalavár, Lebúj-puszta (Kis-Balaton)	46°40'2.67"N	17°9'35.28"E		Kaszab & Székessy		Sziráki 1993a
67	Raphidioptera	Raphidiidae	Raphidia	mediterranea	H. Aspöck et al.	1977			Hungaria	Europe	Fertő-Hanság-Szigetköz Namzeti Park	47°52'5.32"N	17°16'8.13"E		Benedek	1963	Sziráki 1993b
72	Raphidioptera	Raphidiidae	Raphidia	mediterranea	H. Aspöck et al.	1977		11m, 9f	Romania	Europe	C. A. Rosetti (forêt Letea)	45°17′22.79"N	29°32′34.79"E		A. Popescu-Gorj	25.-31.5.1980	Kis 1984
73	Raphidioptera	Raphidiidae	Raphidia	mediterranea	H. Aspöck et al.	1977		2f	Romania	Europe	Sf. Gheorghe (Delta du Danube)	44°53′45"N	29°35′34"E		A. Popescu-Gorj	3.-15.7.1971 und 1972	Kis 1984
74	Raphidioptera	Raphidiidae	Raphidia	mediterranea	H. Aspöck et al.	1977		1m, 1f	Romania	Europe	Tulcea	45°10'17.82"N	28°47'29.19"E		B. Kis	1982-06-10	Kis 1984
75	Raphidioptera	Raphidiidae	Raphidia	mediterranea	H. Aspöck et al.	1977		1f	Romania	Europe	Badadag	44°53'28.72"N	28°43'2"E		B. Kis	1982-06-17	Kis 1984
76	Raphidioptera	Raphidiidae	Raphidia	mediterranea	H. Aspöck et al.	1977		2m	Romania	Europe	Corbu	44°24'34.89"N	28°39'33.43"E		B. Kis	1975-05-01	Kis 1984
77	Raphidioptera	Raphidiidae	Raphidia	mediterranea	H. Aspöck et al.	1977		1m	Romania	Europe	Agigea	44° 5'41.89"N	28°36'31.18"E		K. Nagy	1974-07-11	Kis 1984
78	Raphidioptera	Raphidiidae	Raphidia	mediterranea	H. Aspöck et al.	1977		2f	Romania	Europe	fr. Comarova	43°52'5.09"N	28°35'11.33"E		K. Nagy	1970-07-01	Kis 1984
79	Raphidioptera	Raphidiidae	Raphidia	mediterranea	H. Aspöck et al.	1977		1m	Romania	Europe	Mangalia	43°48'54.88"N	28°34'26.94"E		B. Kis	1964-07-01	Kis 1984
80	Raphidioptera	Raphidiidae	Raphidia	mediterranea	H. Aspöck et al.	1977		1m	Romania	Europe	Hagieni	43°47'7.99"N	28°28'46.40"E		B. Kis	1976-06-20	Kis 1984
81	Raphidioptera	Raphidiidae	Raphidia	mediterranea	H. Aspöck et al.	1977		1m	Romania	Europe	Canauraua Fetii	44°7′59.99"N	27°36'0"E		B. Kis	1967-06-21	Kis 1984
82	Raphidioptera	Raphidiidae	Raphidia	mediterranea	H. Aspöck et al.	1977		3f	Romania	Europe	Bucureşti	44°25'36.35"N	26°6'9.20"E		A. Popescu-Gorj	29.5.-4.6.1969-1974	Kis 1984
83	Raphidioptera	Raphidiidae	Raphidia	mediterranea	H. Aspöck et al.	1977		1m	Romania	Europe	fr. Băneasa (Bucureşti)	44°29'32.82"N	26°4'44.84"E		B. Kis	1978-07-02	Kis 1984
84	Raphidioptera	Raphidiidae	Raphidia	mediterranea	H. Aspöck et al.	1977		1f	Romania	Europe	fr. Pustnicu (Bucureşti)	44°31'60.0"N	26°05'36.3"E		A. Popescu-Gorj	1973-06-22	Kis 1984
85	Raphidioptera	Raphidiidae	Raphidia	mediterranea	H. Aspöck et al.	1977		1m	Romania	Europe	Comana	44°10'21.72"N	26° 8'32.89"E		B. Kis	1978-07-04	Kis 1984
86	Raphidioptera	Raphidiidae	Raphidia	mediterranea	H. Aspöck et al.	1977			Turkey	Europe	Anatolien, Sebepli, Provinz Balikesir	39°58'18"N	27°37'51"E		H. et U. Aspöck		Coll. HUAC
87	Raphidioptera	Raphidiidae	Raphidia	mediterranea	H. Aspöck et al.	1977			Bulgaria	Europe	Pirin Gebirge	41°37'15"N	23°33'1"E				H. Aspöck et al. 1991
88	Raphidioptera	Raphidiidae	Raphidia	mediterranea	H. Aspöck et al.	1977		1f	Bulgaria	Europe	Blagoevgrad Province, Kresna	41°43'14"N	23°9'59"E		B. Nagy	1983-05-11	Sziráki 2014
